# Supplementary material for: Integrated wildlife forensics and systematics identified first evidence of occurrence of Yunnan Giant Flying Squirrel (Petaurista yunnanensis) from India – a case study
Source: Research Square preprint supplement (doi:10.21203/rs.3.rs-8440080/v1), 2026-02-24
Supplement: Supplementary file 1 [file 66a2650b49c7f3a2f8a760cd.docx]

**List of Supplementary figures and table:**

[Supplementary Figure S 1: Phylogenetic relationships (ML) of *Petaurista* constructed based the cytochrome b gene (a) and 16s RNA gene(b). 2](#_Toc200619192)

[Supplementary Figure S 2: A): Wet preserved skin of the Yunnan Giant Flying Squirrel (*Petaurista yunanensis*) (ZSI 32336), archived at the Mammal &amp; Osteology Section, Zoological Survey of India, Kolkata, India. (i) dorsal pelage and (ii) ventral pelage. 2](#_Toc200619193)

[Supplementary Table 1**:** Sample details of *Petaurista* species and GenBank accession number used in the present study 3](#_Toc200619254)

[Supplementary Table 2 *:* List of *Petaurista* specimens and their Cranio-dental measurement archived in the National Zoological Collection of the Zoological Survey of India used in the present morphometric trait analysis. 4](#_Toc200619255)

[Supplementary Table 3: AMOVA results for 25 cranial morphometric measurements of *Petaurista* species. 7](#_Toc200619256)

**Observed Body Morphological Traits**

The dorsal pelage of the specimen (Figure 1a) is a rich reddish-brown to dark chestnut, consistent with published descriptions of *Petauristayunnanensis*. The fur is dense and evenly distributed across the dorsum and upper limbs, with a faintly darker margin along the patagium, indicating a well-developed gliding membrane. The tail is broad, bushy, and nearly equal in length to the head-body axis, displaying a uniform coloration with a subtly lighter distal tip. The ears are small, rounded, and covered with short fur, lacking any prominent tufts. Ventral pelage (Figure 1b) is pale cream to light brown, providing a strong contrast with the dorsal coloration; fur here is slightly less dense but remains plush. The limbs are robust, with well-developed patagia extending from the forelimbs to the hindlimbs, edged with dark brown to blackish fur. The digits are elongated, bearing curved claws adapted for arboreal locomotion. While the soles are not visible, they are presumed to be padded and bare, as typical in gliding sciurids.

**Observed Cranio-Dental Morphological Traits**

The skull (Figure 2) exhibits a moderately arched dorsal profile with a gently sloping forehead and a domed cranium (Figure 2a). The rostrum is short and broad. Zygomatic arches are laterally flared and robust, with a well-developed zygomatic plate (Figure 2c). The auditory bullae are small and compressed (Figure 2b), distinguishing Petaurista *yunnanensis* from sympatric congeners such as *P. philippensis*, which possess more inflated bullae. Dentition is characterized by large, procumbent upper incisors and broad, bunodont cheek teeth with low, rounded cusps (Figure 2b, d). Tooth rows are nearly parallel, and the dental arcade is broadly U-shaped. The palate is wide, flat, and extends beyond the last molars, with visible palatal foramina (Figure 2b). The postorbital processes are prominent and laterally projecting (Figure 2b). The mandible is robust, with a high coronoid process (Figure 2e); the lower incisors are thick and heavily worn (Figure 2d).


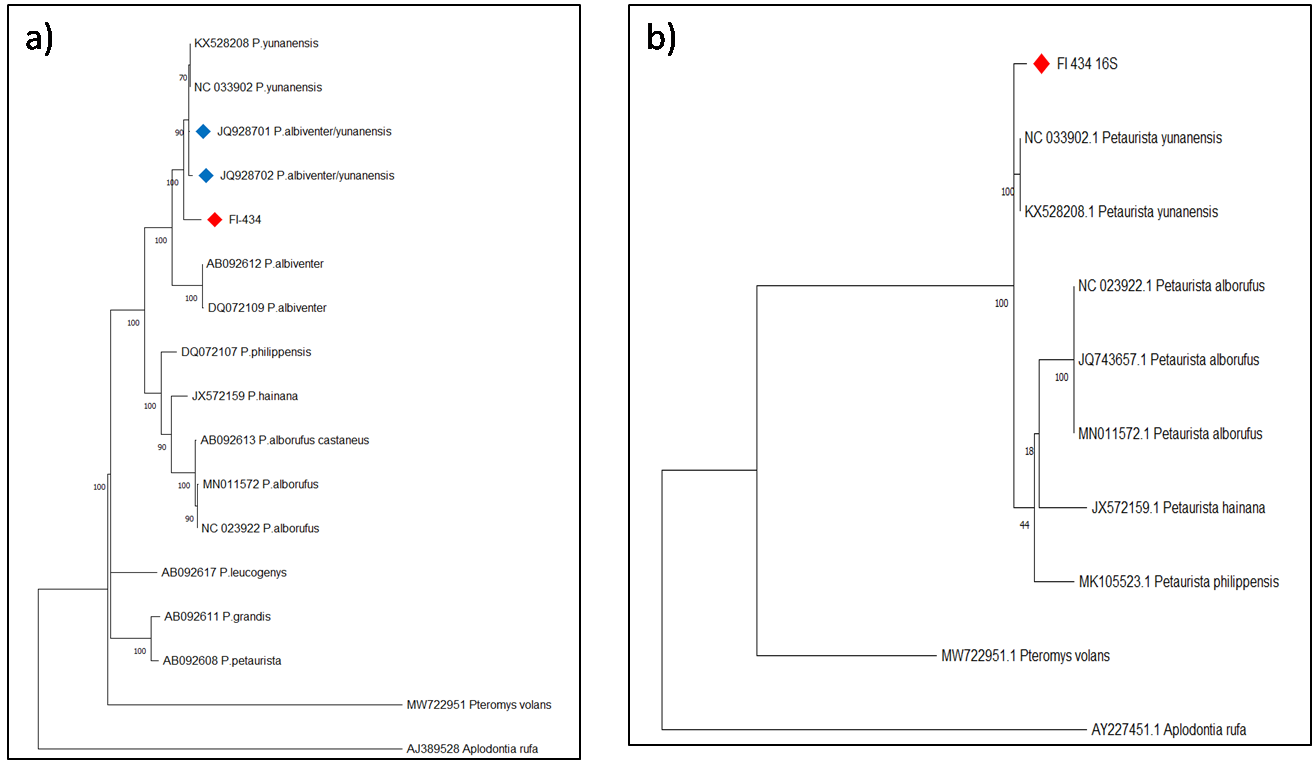


Supplementary Figure S 1: Phylogenetic relationships (ML) of *Petaurista* constructed based the cytochrome b gene (a) and 16s RNA gene(b).


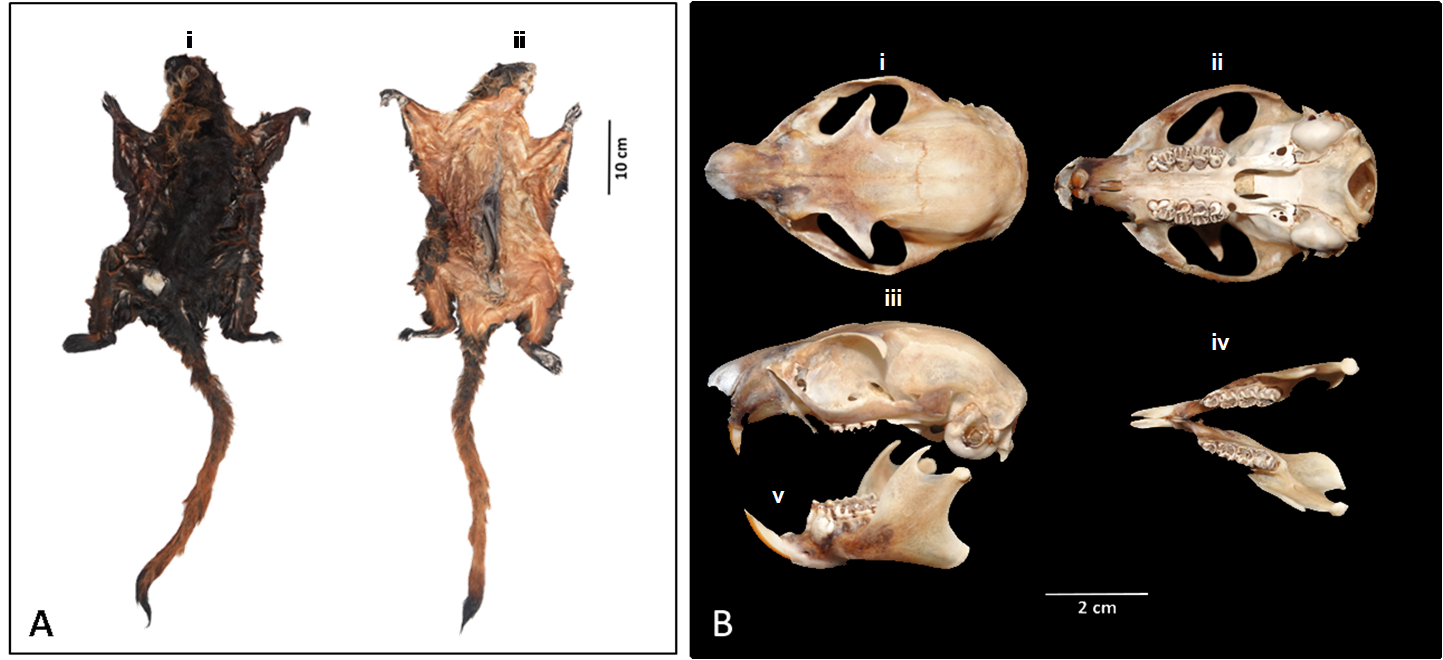


Supplementary Figure S 2: A): Wet preserved skin of the Yunnan Giant Flying Squirrel (*Petaurista yunanensis*) (ZSI 32336), archived at the Mammal &amp; Osteology Section, Zoological Survey of India, Kolkata, India. (i) dorsal pelage and (ii) ventral pelage.

B): Cranium and mandible of the Yunnan Giant Flying Squirrel (*Petaurista yunanensis*) (ZSI 32336), archived at the Mammal &amp; Osteology Section, Zoological Survey of India, Kolkata, India. From top to bottom, i) dorsal, ii) ventral, and iii) lateral views of the cranium, and iv) lateral, and v) occlusal views of the mandible.

Supplementary Table 1**:** Sample details of *Petaurista* species and GenBank accession number used in the present study

| **ACCESSION NUMBER** | **LOCATION** | **CITATION** | **SPECIES** |
| --- | --- | --- | --- |
| **NC033902** | China | Wei et al. 2016 | *P.yunanensis* |
| **KX528208** | China | Wei et al. 2016 | *P.yunanensis* |
| **JQ928701** | Yunlong, Yunnan, China | Li et al. 2013 | *P.albiventer/yunanensis* |
| **JQ928702** | Gongshan, Yunnan, China | Li et al. 2013 | *P.albiventer/yunanensis* |
| **DQ072109** | Pakistan | Li et al. 2013 | *P.albiventer* |
| **AB092612** | Ayubia National Park, Pakistan | Li et al. 2013 | *P.albiventer* |
| **DQ072107** | Yunnan, China | Li et al. 2013 | *P.phillipensis* |
| **JX572159** | Hainana,China | Kong et al. 2015 | *P.hainana* |
| **MN011572** | Guizhou, China | Zhang et al. | *P.alborufus* |
| **NC023922** | Direct submission NCBI | Xu,H. and Wang,Q 2023 | *P.alborufus* |
| **AB092613** | Southern China | Oshida et al. 2004 | *P.alborufus castaneus* |
| **AB092617** | Ehime,Japan | Oshida et al. 2004 | *P.leucogenys* |
| **AB092611** | Nantou,Taiwan | Oshida et al. 2004 | *P.grandis* |
| **AB092608** | Laos | Oshida et al. 2004 | *P.petaurista* |
| **MK105523** | Northern Myanmar/Northern Laos | G. Li et al. 2020 | *P.phillipensis* |
| **MW722951** | Direct submission NCBI | Lim et al. 2018 | *Pteromys volans* |
| **AJ389528** | France | Montgelard et al. 2002 | *Aplodontia rufa* |
| **AY227451** | Direct submission NCBI | Mercer and Roth 2003 | *Aplodontia rufa* |

Supplementary Table 2 *:* List of *Petaurista* specimens and their Cranio-dental measurement archived in the National Zoological Collection of the Zoological Survey of India used in the present morphometric trait analysis.

| Reg. No. | **Species recognised as** | GSL | LUI | UIM | DL | UML | RH | GCH | NW | GNW | NBL | IOB | FBL | FBW | ZB | BB | OCW | TBL | LIL | LIC | LICD | LIA | MH | RMH | LML | LMI |
| --- | --- | --- | --- | --- | --- | --- | --- | --- | --- | --- | --- | --- | --- | --- | --- | --- | --- | --- | --- | --- | --- | --- | --- | --- | --- | --- |
| 20785 | ***Petaurista alborufus*** | 78.58 | 12.88 | 20.94 | 15.37 | 16.86 | 25.34 | 28.2 | 13.61 | 15.86 | 23.64 | 19.38 | 28.44 | 14.96 | 52 | 38.88 | 18.92 | 13.52 | 16.74 | 48.34 | 54.26 | 54.38 | 32.75 | 18.36 | 18.71 | 17.75 |
| 20786 | ***Petaurista alborufus*** | 81.86 | 9.58 | 21.28 | 16.81 | 16.95 | 24.07 | 27 | 14.19 | 15.7 | 24.19 | 19.14 | 29.42 | 14.81 | 51.49 | 36.64 | 19.1 | 11.86 | 18.51 | 47.01 | 53.47 | 56.24 | 32.54 | 15.05 | 18.94 | 18.58 |
| 15058 | ***Petaurista petaurista*** | 73.27 | 12.04 | 19.13 | 14.1 | 16.85 | 23.51 | 27.65 | 14.03 | 15.11 | 23.36 | 17.75 | 26.59 | 14.62 | 49.35 | 35.64 | 18.87 | 13.16 | 15.32 | 41.26 | 51.67 | 51.98 | 30.29 | 14.19 | 16.48 | 17.62 |
| 25526 | ***Petaurista petaurista*** | 83.34 | 10.17 | 22.84 | 18.35 | 17.47 | 26.48 | 29.32 | 15.39 | 19.04 | 25.31 | 18.88 | 29.92 | 17.43 | 51.7 | 39.55 | 20.37 | 14.55 | 16.84 | 49.31 | 56.69 | 57.92 | 35.1 | 16.33 | 18.46 | 19.74 |
| 26665 | ***Petaurista petaurista*** | 81.55 | 11.35 | 19.82 | 17.57 | 16.73 | 25.13 | 27.69 | 15.71 | 16.05 | 26.29 | 19.44 | 27.78 | 14.17 | 52.86 | 38.04 | 18.21 | 13.59 | 14.63 | 47.32 | 55.56 | 55.96 | 32.67 | 17.08 | 17.96 | 17.88 |
| 26666 | ***Petaurista petaurista*** | 80.71 | 16.07 | 22.68 | 17.81 | 17.25 | 24.86 | 28.75 | 15.82 | 16.85 | 22.88 | 19.79 | 28.66 | 15.14 | 52.02 | 39.14 | 22.22 | 14.15 | 17.38 | 49.03 | 55.89 | 56.79 | 34.4 | 15.12 | 17.54 | 18.81 |
| 23786 | ***Petaurista petaurista*** | 79.54 | 11.37 | 20.39 | 16.01 | 17.4 | 24.98 | 29.3 | 15.86 | 16.97 | 19.86 | 19.13 | 28.89 | 16.33 | 49.42 | 36.02 | 18.7 | 12.83 | 17.93 | 46.56 | 54.95 | 56.02 | 31.82 | 15.54 | 18.88 | 18.65 |
| 23785 | ***Petaurista petaurista*** | 80.25 | 9.98 | 21.19 | 17.2 | 16.91 | 25.17 | 28.91 | 12.68 | 16.73 | 25.32 | 17.98 | 27.5 | 16.01 | 51.62 | 37.19 | 18.38 | 13.49 | 15.7 | 48.19 | 53.78 | 54.04 | 34.36 | 15.32 | 18.22 | 18.03 |
| 23787 | ***Petaurista petaurista*** | 77.81 | 10.03 | 21.18 | 17.38 | 16.57 | 23.77 | 30.57 | 15.08 | 16.04 | 25.15 | 17.38 | 26.65 | 15.19 | 52.36 | 37.93 | 20.03 | 14.41 | 14.02 | 48.01 | 54.44 | 55.58 | 34.09 | 15.53 | 17.97 | 19.12 |
| 9719 | ***Petaurista petaurista*** | 72.43 | 8.82 | 19.34 | 15.24 | 16.56 | 21.78 | 28.11 | 12.87 | 14.72 | 20.85 | 20.02 | 27.42 | 14.85 | 47.04 | 36.56 | 18.39 | 14.65 | 17.5 | 41.39 | 49.98 | 50.49 | 27.42 | 15.83 | 17.86 | 16.1 |
| 9714 | *Petaurista cineraceus* | 74.64 | 8.15 | 19.31 | 15.51 | 16.03 | 25.33 | 26.08 | 13.85 | 15.82 | 24.6 | 21.69 | 27.54 | 16.41 | 51.38 | 41.89 | 18.68 | 13.63 | 14.74 | 43.29 | 50.65 | 52.22 | 31.03 | 17.19 | 18.88 | 15.96 |
| 24270 | ***Petaurista caniceps*** | 59.83 | 8.47 | 17.39 | 12.62 | 13.29 | 18.44 | 23.17 | 10.16 | 11.38 | 15.65 | 14.72 | 21.46 | 11.85 | 39.35 | 29.61 | 13.92 | 12.43 | 12.69 | 37.06 | 41.59 | 43.6 | 25.58 | 12.85 | 14.35 | 15.08 |
| 24269 | ***Petaurista caniceps*** | 57.76 | 7.8 | 15.14 | 13.59 | 13.22 | 18.47 | 21.93 | 10.23 | 11.4 | 16.37 | 15.67 | 23.76 | 10.21 | 37.8 | 27.74 | 13.73 | 12.08 | 13.23 | 34.28 | 39.04 | 40.05 | 23.24 | 11.83 | 15.21 | 15.28 |
| 24273 | ***Petaurista caniceps*** | 64.16 | 7.9 | 17.36 | 14.31 | 13.5 | 20.11 | 24.94 | 10.93 | 11.79 | 19.05 | 15.98 | 22.5 | 11.57 | 39.92 | 30.88 | 15.61 | 13.69 | 13.93 | 38.02 | 43.1 | 44.95 | 26.87 | 11.76 | 15.86 | 15.02 |
| 24267 | ***Petaurista caniceps*** | 62.17 | 10.71 | 15.87 | 11.8 | 14.44 | 20.03 | 24.34 | 11.05 | 12.42 | 20.18 | 15.11 | 22.08 | 11.7 | 40.45 | 30.52 | 14.05 | 12.23 | 12.48 | 37.97 | 42.3 | 44.08 | 26.15 | 12.68 | 14.61 | 13.51 |
| 24194 | ***Petaurista caniceps*** | 66.65 | 9.48 | 18.42 | 13.93 | 15.88 | 22.49 | 26.06 | 11.88 | 12.11 | 21.59 | 16.9 | 25.97 | 13.26 | 45.89 | 32.25 | 14.44 | 11.82 | 16.35 | 40.07 | 47.79 | 48.74 | 28.52 | 14.38 | 17.65 | 15.61 |
| 24271 | ***Petaurista caniceps*** | 63.78 | 8.61 | 17.26 | 13.91 | 14.24 | 18.09 | 23.32 | 11.42 | 11.85 | 20.71 | 15.03 | 22.85 | 11.3 | 40.29 | 29.69 | 14.54 | 12.07 | 14.26 | 39.61 | 43.98 | 44.62 | 26.11 | 14.35 | 14.43 | 15.57 |
| 9732 | ***Petaurista magnificus*** | 70.33 | 9.41 | 21.98 | 14.29 | 14.07 | 24.06 | 29.22 | 12.02 | 17.49 | 21.31 | 18.23 | 25.22 | 14.27 | 45.94 | 34.17 | 17.86 | 12.77 | 13.95 | 43.64 | 49.54 | 49.6 | 31.27 | 16.22 | 16.15 | 17.24 |
| 23263 | ***Petaurista nobilis*** | 71.17 | 6.7 | 19.18 | 14.57 | 14.94 | 21.26 | 27.98 | 11.86 | 13.98 | 20.83 | 17.57 | 23.98 | 13.65 | 46.38 | 35.56 | 17.63 | 12.27 | 14.96 | 42.95 | 48.73 | 48.54 | 29.27 | 14.28 | 16.33 | 16.39 |
| 23254 | ***Petaurista nobilis*** | 74.39 | 8.95 | 21.63 | 19.54 | 16.19 | 22.75 | 23.99 | 14.09 | 15.05 | 22.75 | 17.64 | 27.58 | 12.68 | 48.77 | 35.46 | 15.89 | 12.5 | 13.89 | 43.95 | 50.33 | 50.74 | 26.53 | 15.07 | 17.36 | 18.21 |
| 18616 | ***Petaurista nobilis*** | 71.91 | 8.54 | 22.44 | 17.25 | 15.21 | 22.81 | 24.84 | 14.33 | 15.31 | 19.99 | 18.65 | 29.4 | 14.29 | 48.2 | 36.24 | 18.39 | 13.02 | 13.56 | 44.23 | 48.55 | 50.46 | 30.11 | 12.88 | 18.83 | 17.85 |
| 23259 | ***Petaurista nobilis*** | 70.16 | 8.73 | 21.48 | 18.24 | 14.38 | 22.37 | 23.35 | 14.19 | 15.77 | 20.12 | 17.56 | 27.31 | 13.47 | 47.9 | 35.1 | 16.47 | 11.17 | 14.15 | 43.58 | 49.48 | 49.83 | 28.61 | 15.16 | 16.42 | 18.95 |
| 24276 | ***Petaurista nobilis*** | 74.04 | 10.42 | 22.67 | 17.97 | 14.76 | 22.11 | 23.93 | 15.31 | 16.49 | 23.36 | 16.6 | 30.11 | 13.27 | 47.37 | 34.24 | 18.25 | 12.89 | 16.53 | 45.63 | 51.81 | 52.52 | 29.49 | 15.27 | 17.19 | 20.89 |
| 24274 | ***Petaurista nobilis*** | 71.88 | 10.96 | 19.38 | 13.8 | 15.5 | 21.7 | 26.35 | 11.9 | 13.85 | 21.74 | 17.54 | 27.34 | 13.05 | 46.94 | 34.06 | 17.24 | 13.22 | 16.23 | 45.96 | 49.84 | 50.39 | 30.5 | 15.32 | 17.22 | 16.19 |
| 23261 | ***Petaurista nobilis*** | 67.54 | 8.85 | 17.92 | 13.4 | 11.41 | 21.76 | 25.84 | 12.82 | 13.31 | 21.26 | 18.07 | 24.39 | 11.05 | 44.34 | 33.16 | 16 | 12.64 | 13.95 | 39.61 | 46.89 | 47.77 | 27.57 | 14 | 15.89 | 15.62 |
| 24277 | ***Petaurista nobilis*** | 70.97 | 10.92 | 18.44 | 13.72 | 15.96 | 22.03 | 24.72 | 13.84 | 14.75 | 19.66 | 19.14 | 25.43 | 12.47 | 46.57 | 35 | 16.84 | 12.72 | 17.19 | 41.17 | 49.85 | 50.84 | 29.8 | 14.97 | 17.7 | 16.32 |
| 24275 | ***Petaurista nobilis*** | 73.55 | 8.75 | 18.89 | 14.25 | 16.4 | 22.9 | 26.81 | 14.61 | 15.21 | 19.71 | 17.7 | 26.06 | 13.56 | 46.38 | 35.38 | 17.21 | 13.01 | 15.55 | 42.02 | 49.01 | 50.6 | 29.51 | 14.89 | 17.71 | 16.47 |
| 21297 | *Petaurista petaurista* | 68.48 | 9.58 | 18.32 | 14.35 | 14 | 20.79 | 27.24 | 12.56 | 14.48 | 19.62 | 18.18 | 23.78 | 14.19 | 45.2 | 32.48 | 15.69 | 14.24 | 13.42 | 39.43 | 47 | 47.55 | 27.86 | 14.16 | 15.89 | 15.03 |
| 15054 | ***Petaurista albiventer*** | 69.75 | 10.37 | 16.58 | 14.49 | 15.87 | 21.89 | 27.2 | 12.21 | 13.81 | 19.94 | 16.58 | 24.91 | 13.67 | 44.99 | 32.95 | 16.02 | 13.1 | 15.67 | 42.01 | 46.77 | 48.05 | 30.13 | 15.3 | 16.03 | 14.93 |
| 15052 | ***Petaurista albiventer*** | 67.27 | 9.19 | 15.54 | 13.48 | 15.27 | 19.51 | 26.12 | 12.82 | 14.22 | 20.58 | 17.31 | 23.38 | 12.39 | 43.81 | 31.86 | 16.45 | 12.38 | 14.33 | 36.86 | 44.79 | 46.63 | 29.71 | 14.53 | 16.24 | 13.39 |
| 15053 | ***Petaurista albiventer*** | 59.31 | 10.57 | 15.48 | 12.72 | 11.61 | 18.19 | 20.12 | 8.56 | 9.92 | 19.59 | 12.63 | 20.83 | 9.45 | 34.87 | 24.25 | 12.75 | 14.11 | 15.42 | 34.48 | 38.26 | 38.87 | 21.63 | 12.3 | 11.48 | 14.21 |
| 15046 | ***Petaurista petaurista*** | 70.78 | 9.88 | 18.26 | 15.03 | 16.23 | 24.58 | 26.51 | 12.71 | 15.59 | 21.85 | 19.05 | 25.56 | 12.87 | 46.66 | 34.13 | 16.98 | 13.36 | 15.38 | 43.08 | 50.06 | 52.39 | 29.87 | 15.01 | 17.91 | 17.36 |
| 15048 | ***Petaurista petaurista*** | 74.66 | 13.82 | 20.08 | 15.75 | 17.11 | 23.93 | 27.08 | 12.65 | 14.91 | 23.76 | 16.77 | 27.17 | 13.46 | 46.88 | 35.88 | 17.82 | 15.14 | 16.61 | 43.93 | 51.3 | 53.63 | 31.15 | 16.44 | 17.83 | 18.09 |
| 16348 | ***Petaurista philippensis*** | 80.29 | 10.05 | 21.34 | 16.57 | 16.63 | 25.08 | 28.24 | 15.41 | 15.78 | 24.43 | 20.85 | 28.12 | 15.97 | 52.92 | 39.75 | 18.24 | 13.85 | 12.5 | 47.09 | 54.53 | 53.54 | 31.75 | 16.96 | 18.22 | 17.31 |
| 9746 | ***Petaurista petaurista*** | 66.2 | 6.6 | 16.72 | 14.54 | 15.13 | 23.15 | 24.42 | 11.6 | 14.09 | 20.65 | 17.4 | 23.77 | 12.31 | 45.66 | 32.84 | 15.81 | 11.83 | 11.06 | 39.34 | 44.9 | 45.25 | 27.16 | 13.59 | 15.84 | 14.44 |
| 21294 | ***Petaurista philippensis*** | 66.61 | 9.33 | 17.65 | 12.75 | 13.52 | 20.84 | 24.34 | 11.95 | 13.79 | 18.88 | 17.25 | 24.77 | 12.75 | 42.54 | 31.53 | 14.2 | 12.72 | 14.33 | 38.68 | 44.14 | 45.64 | 27.67 | 13.41 | 15.18 | 14.49 |
| 21295 | ***Petaurista philippensis*** | 66.05 | 12.54 | 17.64 | 13.32 | 13.34 | 19.64 | 24.25 | 10.83 | 13.5 | 18.79 | 17.44 | 24.12 | 12.54 | 43.48 | 32.07 | 15.26 | 12.06 | 15.05 | 40.36 | 45.59 | 45.52 | 26.56 | 12.66 | 14.69 | 15.24 |
| 26696 | ***Petaurista philippensis*** | 66.94 | 10.17 | 16.89 | 13.87 | 13.82 | 20.16 | 25.14 | 12.64 | 14.31 | 18.66 | 16.88 | 24.34 | 13.14 | 43.25 | 32.88 | 14.87 | 13.25 | 15.85 | 36.01 | 42.25 | 45.86 | 25.26 | 13.42 | 15.23 | 14.41 |
| 21293 | ***Petaurista philippensis*** | 66.73 | 7.64 | 17.47 | 12.95 | 13.32 | 20.7 | 25.5 | 12.46 | 14.84 | 20.36 | 16.59 | 23.47 | 12.76 | 45.15 | 33.33 | 15.33 | 13 | 15.4 | 39.85 | 45 | 46.46 | 27.92 | 14.14 | 15.41 | 14.47 |
| 20074 | ***Petaurista philippensis*** | 74.8 | 11.16 | 20.58 | 15.77 | 15.99 | 23.39 | 26.46 | 12.95 | 15.08 | 21.72 | 17.25 | 28.21 | 14.39 | 50.51 | 37.63 | 17.26 | 15.45 | 15.27 | 45.2 | 52.78 | 54.09 | 33.17 | 15.85 | 17.58 | 17.41 |
| 20075 | ***Petaurista philippensis*** | 73.31 | 9.34 | 19.34 | 16.22 | 15.33 | 23.97 | 27.1 | 12.69 | 14.88 | 21.21 | 17.94 | 28.77 | 14.33 | 47.04 | 36.53 | 17 | 13.87 | 16.01 | 43.57 | 50.42 | 51.21 | 30.51 | 16.5 | 17.14 | 16.93 |
| 20076 | ***Petaurista philippensis*** | 72.29 | 9.63 | 19.17 | 15.26 | 16.11 | 23.53 | 26.36 | 12.38 | 14.99 | 21.03 | 17.45 | 26.49 | 13.41 | 48.69 | 34.69 | 17.38 | 15.44 | 13.71 | 41.7 | 50.46 | 50.91 | 29.77 | 15.56 | 17.73 | 16.61 |
| 20077 | ***Petaurista philippensis*** | 74.42 | 9.69 | 20.91 | 17.17 | 15.62 | 23.38 | 26.99 | 12.3 | 15.17 | 22.14 | 16.64 | 27.05 | 14.16 | 48.85 | 36.39 | 17.09 | 14.85 | 16.78 | 46.15 | 52.68 | 53.44 | 29.87 | 15.44 | 17.53 | 17.92 |
| 20078 | ***Petaurista philippensis*** | 71.12 | 9.16 | 18.58 | 15.11 | 15.18 | 22.47 | 25.97 | 12.37 | 13.87 | 21.33 | 17.33 | 27.49 | 14.99 | 47.8 | 35.3 | 17.09 | 13.86 | 15.22 | 42.9 | 48.96 | 50.61 | 30.33 | 15.94 | 16.69 | 16.02 |
| 20079 | ***Petaurista philippensis*** | 68.99 | 10.89 | 18.35 | 14.17 | 14.71 | 21.03 | 26.06 | 12.14 | 14.13 | 19.7 | 16.71 | 27.32 | 13.79 | 44.04 | 33.67 | 16.72 | 13.92 | 14.6 | 40.32 | 45.47 | 46.64 | 26.12 | 14.66 | 16.65 | 16.16 |
| 20080 | ***Petaurista philippensis*** | 74.24 | 8.37 | 20.01 | 16.28 | 15.05 | 22.96 | 27.67 | 13.66 | 15.47 | 22.17 | 17.98 | 31.51 | 14.42 | 46.16 | 37.48 | 17.56 | 14.28 | 13.44 | 42.7 | 49.31 | 51.5 | 29.93 | 16.36 | 16.48 | 17.27 |
| 15067 | ***Petaurista philippensis*** | 71.85 | 12.17 | 20.33 | 16.25 | 15.11 | 22.64 | 24.69 | 13.93 | 15.71 | 20.99 | 17.46 | 26.16 | 13.48 | 46.66 | 34.93 | 16.71 | 15.52 | 15.9 | 42.33 | 48.25 | 50.81 | 30.34 | 15.43 | 16.87 | 16.88 |
| 15071 | ***Petaurista philippensis*** | 80.57 | 14.62 | 19.93 | 17.19 | 16.49 | 26.46 | 24.49 | 13.31 | 17.51 | 24.37 | 22.7 | 22.64 | 13.12 | 48.52 | 30.51 | 19.47 | 17.33 | 19.73 | 41.85 | 52.47 | 55.97 | 32.78 | 17.05 | 16.56 | 16.15 |
| 20073 | ***Petaurista philippensis*** | 74.57 | 10.98 | 21.02 | 17.16 | 16.71 | 23.38 | 25.52 | 13.74 | 14.66 | 21.94 | 18.23 | 27.76 | 15 | 49.37 | 35.15 | 17.42 | 14.18 | 17.25 | 45.24 | 53.19 | 54.02 | 30.24 | 15.87 | 16.61 | 18.14 |
| 9805 | ***Petaurista philippensis*** | 71.21 | 10.33 | 18.13 | 12.9 | 15.18 | 23.28 | 26.3 | 10.6 | 13.9 | 21.01 | 18.02 | 25.58 | 14.47 | 45.63 | 33.94 | 17.23 | 13.77 | 15.02 | 40.3 | 48.35 | 48.18 | 28.52 | 14.83 | 17.49 | 16.04 |
| 3808 | ***Petaurista philippensis*** | 63.71 | 6.66 | 14.76 | 11.56 | 13.59 | 18.83 | 24.93 | 10.35 | 12.55 | 16.37 | 17.35 | 21.8 | 11.98 | 41.08 | 30.49 | 14.25 | 12.71 | 14.54 | 35.87 | 41.67 | 43.53 | 25.24 | 12.81 | 15.13 | 13.55 |
| 9708 | ***Petaurista philippensis*** | 74.64 | 10.24 | 19.76 | 14.45 | 15.43 | 22.12 | 27.14 | 13.01 | 14.61 | 21.62 | 18.53 | 25.43 | 15.95 | 47.59 | 35.78 | 17.19 | 15.4 | 16.15 | 44.36 | 50.89 | 51.6 | 31.76 | 16.97 | 16.69 | 16.95 |
| 23717 | ***Petaurista sybilla*** | 58.36 | 9.61 | 15.36 | 11.92 | 12.99 | 18.34 | 23.68 | 10.28 | 11.39 | 17.01 | 17.67 | 20.76 | 10.56 | 39.27 | 28.62 | 14.35 | 10.92 | 11.75 | 34.58 | 38.9 | 39.68 | 22.49 | 11.81 | 14.01 | 13.54 |
| 32336 | ***FI-434*** | 71.8 | 9.32 | 17.41 | 13.65 | 16.61 | 21.55 | 27.33 | 12.77 | 14.17 | 20.91 | 18.42 | 23.7 | 14.89 | 45.17 | 31.82 | 17.03 | 11.95 | 14.96 | 41.67 | 48.67 | 48.72 | 28.58 | 15.22 | 16.13 | 15.64 |

The measurements include Greater Skull Length (GSL), Length of Upper Incisor (LUI), Upper Incisor to Molar Length (UIM), Length of Diastema (DL), Upper Molar Length (UML), Rostrum Height (RH), Greater Cranial Height (GCH), Nasal Width (NW), Greater Nasal Width (GNW), Nasal Bone Length (NBL), Interorbital Breadth (IOB), Frontal Bone Length (FBL), Frontal Bone Width (FBW), Zygomatic Breadth (ZB), Braincase Breadth (BB), Occipital Condyle Width (OCW), Tympanic Bulla Length (TBL), Lower Incisor Length (LIL), Lower Incisor to Coronoid (LIC), Lower Incisor to Condyle (LICD), Lower Incisor to Angular (LIA), Mandibular Height (MH), Ramus to Molar Height (RMH), Lower Molar Length (LML), and Lower Molar to Incisor Length (LMI).

Supplementary Table 3: AMOVA results for 25 cranial morphometric measurements of Petaurista species.

|  | Trait Index | F_value | P_value |
| --- | --- | --- | --- |
| GSL* | GSL* | 8.487 | 7.69E-07 |
| LUI | Length of U Incisor | 1.533 | 0.174 |
| UIM* | U incisor to Molar* | 4.689 | 3.55E-04 |
| DL* | Diastema L* | 2.714 | 0.0163 |
| UML* | Upper Molar L* | 4.506 | 4.97E-04 |
| RH** | Ros H** | 7.927 | 1.73E-06 |
| GCH** | G Cranial H** | 6.265 | 2.31E-05 |
| NW* | Nasal W* | 4.319 | 7.04E-04 |
| GNW** | G Nasal W** | 10.427 | 5.67E-08 |
| NBL* | Nasal bone L* | 4.118 | 0.00103 |
| IOB** | Inter Orbital breadth** | 6.122 | 2.92E-05 |
| FBL* | Frontal bone L* | 4.022 | 0.00124 |
| FBW* | Frontal bone W* | 4.991 | 2.06E-04 |
| ZB** | ZB** | 7.647 | 2.63E-06 |
| BB** | BB** | 7.326 | 4.27E-06 |
| OCW** | Occipital condyle W** | 6.92 | 8.03E-06 |
| TBL* | Tympanic bulla L* | 4.585 | 4.30E-04 |
| LIL* | Lower.Incisor.L | 2.005 | 0.0687 |
| LIC** | Lower.I.to.Coroniod** | 5.02 | 0.000195 |
| LICD** | Lower.I.to.Condyl** | 6.36 | 0.00002 |
| LIA** | Lower.I.to. ** | 6.753 | 0.00001 |
| MH | angular |
| RMH | MH** | 6.317 | 0.00002 |
| LML | Ramus.to. | 4.095 | 0.00107 |
| LMI | Molar.H* |
| GSL* | Lower.molar.L** | 4.92 | 0.00023 |
| LUI* | Lower.molar.to.I* | 4.085 | 0.00109 |
|  | Significant * , Highly significant ** | | |
